# Supplementary material for: Compromised Mitochondrial Fatty Acid Synthesis in Transgenic Mice Results in Defective Protein Lipoylation and Energy Disequilibrium
Source: PubMed Central journal article supplement (PMC3471957; doi:10.1371/journal.pone.0047196), 2012-10-15

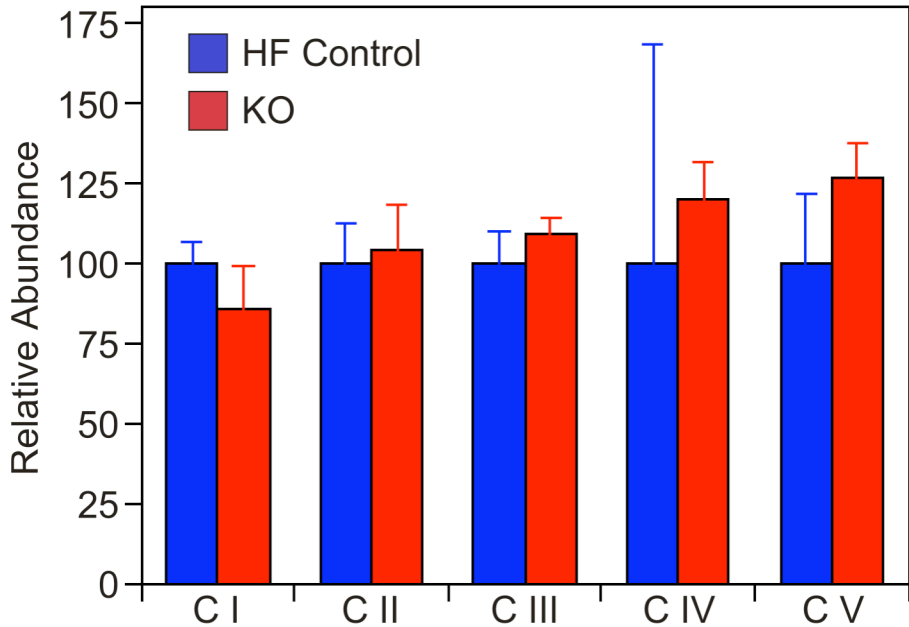

Supplement: pone.0047196.s004.pdf [file pone.0047196.s004.pdf]
